# Supplementary material
Source: PubMed Central journal article supplement (PMC5864122)
Supplement: DC171624SupplementaryData.pdf [file DC171624SupplementaryData.pdf]

## SUPPLEMENTARY DATA

### Steering Committee Members

American Association of Clinical Endocrinologists - Lawrence Blonde, MD, Sripriya Raman, MD; American Association of Diabetes Educators - Karen N. Harriman, FNP-BC, CDE, Molly McElwee-Malloy, RN, CDE; American Diabetes Association - Alicia H. McAuliffe-Fogarty, PhD, Paul Madden, MD; Endocrine Society – Evgenia Gourgari, MD, Anne Peters, MD; JDRF International - Aaron J. Kowalski, PhD; The Leona M. and Harry B. Helmsley Charitable Trust - Gina Agiostratidou, PhD; Pediatric Endocrine Society - Kent Reifschneider, MD, Karen Rubin, MD, Stuart A. Weinzimer, MD; T1D Exchange - Henry Anhalt, DO, Dana Ball

### Advisory Committee Members

#### People with type 1 diabetes

Amanda Bartelme, Adam Brown, Kelly Close, Nicole Johnson, Rebecca Killion, Jenifer Levinson, Anna McCollister-Slipp, Margery Perry

#### Research

Stephanie Amiel - King's College London, Barbara Jane Anderson-Thomas, PhD - Baylor College of Medicine, Roy Beck, MD, PhD - Jaeb Center for Health Research, Richard Bergenstal, MD - International Diabetes Center, Sarah Corathers, MD - University of Cincinnati Department of Internal Medicine, Philip Cryer, MD - Washington University, Judith Fradkin, MD - National Institute of Diabetes and Digestive and Kidney Diseases, Tom Gardner, MD - University of Michigan, Carla Greenbaum, MD - Benaroya Research Institute, Irl Hirsch, MD - University of Washington School of Medicine, Dixon Kaufman, MD - University of Wisconsin, Madison School of Medicine and Public Health, David Klonoff, MD - University of California, San Francisco, Lori Laffel, MD - Joslin Diabetes Center, Michael Rickels, MD - University of Pennsylvania Institute for Diabetes, Obesity & Metabolism, Robert Sherwin, MD - Yale School of Medicine, Mike Williams - JDRF Australia

#### Industry

Representatives from Abbott Diabetes Care, AstraZeneca, Becton Dickinson and Company, Bigfoot Biomedical, Boehringer Ingelheim, Dexcom, Inc., DreamMed, Insulet Corporation, Janssen, Johnson & Johnson Diabetes Care Companies, Lexicon Pharmaceuticals, Inc., Lilly Diabetes, Medtronic, Merck, Novo Nordisk Inc., Pfizer, Roche Diabetes Care, Inc., Sanofi, Tandem, Tidepool, UCB Biopharma SPRL, Verily, ViaCyte, and Xeris
